# Supplementary material for: RING finger ubiquitin E3 ligase gene TaSDIR1-4A contributes to determination of grain size in common wheat
Source: PubMed Central journal article supplement (PMC7501821; doi:10.1093/jxb/eraa271), 2020-06-01
Supplement: eraa271_suppl_supplementary_table.pdf [file eraa271_suppl_supplementary_table.pdf]

Table S1. Thirty-two accessions of the diverse wheat population used for nucleotide polymorphism detection

| No. | Accession Name   |
|-----|------------------|
| 1   | PANDAS           |
| 2   | An85 zhong124-1  |
| 3   | Yanzhanyihao     |
| 4   | Bawangbian       |
| 5   | Beijing 10       |
| 6   | Beijing 14       |
| 7   | Canzhouxiaomai   |
| 8   | Changwu 131      |
| 9   | Chang 6878       |
| 10  | Dali 1           |
| 11  | Dan R8093        |
| 12  | Fengkang 13      |
| 13  | Jimai 41         |
| 14  | Jimai 6          |
| 15  | Jin 2148 - 7     |
| 16  | Jinghe 8922      |
| 17  | Linkang 5108     |
| 18  | Baiqimai         |
| 19  | Changle 5        |
| 20  | Hongheshang      |
| 21  | Beijing 8686     |
| 22  | 04-044           |
| 23  | 04-030           |
| 24  | Chun22 9th-25    |
| 25  | Ziganbaimangxian |
| 26  | Jingpin 10       |
| 27  | Chun04 9th-5-1   |
| 28  | Chun45 9th-50-1  |
| 29  | Neixiang 188     |
| 30  | Jing 411         |
| 31  | Chinese Spring   |
| 32  | Baicaomai        |

Table S2. Primers used for this study

| Primer set | Nucleotide sequence (5' to 3' )  | Experimental purpose            |
|------------|----------------------------------|---------------------------------|
| AF1        | GTTGGATCGTGAAGACGTACGACTACTTC    | A genome-specific primers       |
| AR1        | CCTTCCTCTTGTGATGTTTATGCATCCAAAGG | A genome-specific primers       |
| M13F       | TGTA AACGACGCCAGT                | Sequencing primers for A genome |
| M13R       | CAGGAAACAGCTATGACC               | Sequencing primers for A genome |
| AF2        | CAAGAAGAAGGTTTCGGGATGAAGCAC      | Sequencing primers for A genome |

|                 |                                                       |                                 |
|-----------------|-------------------------------------------------------|---------------------------------|
| AF3             | GCGACGTCGATTGTGTCAGAAATAAGAAGG                        | Sequencing primers for A genome |
| AF4             | GGGATTCCAGAAATTGCAGTTTCGGTTG                          | Sequencing primers for A genome |
| AF5             | CTTTTGTCGGATTGCTCAGAACTGTCTC                          | Sequencing primers for A genome |
| AR2             | GTTGACCAATTTCTATAAGCATCCTAGGAATCC                     | Sequencing primers for A genome |
| SDIR1-A-c-F     | CTAGTCTAGAATGAGCTTTGTGTTCCGGGGCAGC                    | pCAMBIA1300 construction        |
| SDIR1-A-c-R     | ATGCGGTACCCACCATGGCATCCATTTTCGCT                      | pCAMBIA1300 construction        |
| SDIR-VIGS-F     | TTCTCCGTTGCTAGCATCACAAAGAGGAAGGAAGTGGGA<br>ACAC       | VIGS vector construction        |
| SDIR-VIGS-R     | TTTTTTTTTAGCTAGCCATGTGAACTGCATTGATCCATGGT<br>TGC      | VIGS vector construction        |
| TaERF-AD-DBF    | TGCCTCTCCGAATTCCTGCTAAAAGGAAGAGAAAGAAC<br>CAGTTCAG    | pB42AD vector construction      |
| TaERF-AD-DBR    | CGAGTCGGCCGAATTCGGAGCCATAGGAGCTTCTTCTGG               | pB42AD vector construction      |
| LacZ-F          | ATCTGTGACCTCGAGGTGGAAGGGTGGCGTGTAAAGAG<br>AATATC      | H10 & L14 pLacZi construction   |
| LacZ-R          | GAGCACATGCCTCGAGCCTCAACCGAAACTGCAATTTCT<br>GGAATC     | H10 & L14 pLacZi construction   |
| SDIR1-A-qF      | GCCAACCATAGCCCTTGCTTCGAGA                             | Real-time PCR                   |
| SDIR1-A-qR      | CAGTCATAGAAGGAGCATGTGGGCTATTGTCA                      | Real-time PCR                   |
| pMAL-c5X-F      | CGCGATATCGTCGACGGATCCATGAGCTTTGTGTTC                  | pMAL-c5X vector construction    |
| pMAL-c5X-R      | TTAATTACCTGCAGGGAATTCACCATGGCATCCATTTTC               | pMAL-c5X vector construction    |
| H-Y-F           | CTTGCATCGGTTTTATGTGAACTGCATTGATCCATG                  | Mutant pMAL-c5X construction    |
| H-Y-R           | CATGGATCAATGCAGTTCACATAAAACCGATGCAAG                  | Mutant pMAL-c5X construction    |
| AG-Age I-F      | AGTTGCTCTAAGATCATAACTCGATACGGCCATCG                   | dCAPs Marker                    |
| AG-Age I-R      | TTGCTCGCGCGGACGCGGGTACCGG                             | dCAPs Marker                    |
| TaERF-4T1-DBF1  | CGTGGATCCCCGGAATTCCTCTGCTAAAAGGAAGAGAAAG<br>AACCAGTTC | EMSA                            |
| TaERF-4T1-DBR1  | GAGTCGACCCGGAATTCAGGAGCCATAGGAGCTTCTTC<br>TGG         | EMSA                            |
| Hap-LUC-F       | CGGTATCGATAAGCTTGTGGAAGGGTGGCGTGTAAAGAGA<br>ATATC     | Reporter Vector                 |
| Hap-LUC-R       | TTGGCGTCTTCCATGGCCTCAACCGAAACTGCAATTTCT<br>GGAATC     | Reporter Vector                 |
| TaERF3-1300-F   | GATCAAGCTTACTTGTACACCTGTGACCCATG                      | Effector Vector                 |
| TaERF3-1300-F   | TCAGACTAGTGTCTTTGTCTAGTCCCTCGGAAGGC                   | Effector Vector                 |
| TaERF115-1300-F | GATCAAGCTTCATGAAGGTGAACACTAGGGCGATG                   | Effector Vector                 |
| TaERF115-1300-R | TCAGACTAGTCTGCCTAACATAGGGCAACAATGTCC                  | Effector Vector                 |

Table S3. Accessions possessing different haplotypes of *TaSDIR1-4A* randomly selected from Population 1 & 2

| Haplotypes      | Population 1 | Population 2 |
|-----------------|--------------|--------------|
| <i>Hap-4A-1</i> | DH1          | DH23         |
|                 | DH14         | DH55         |

|                 |                   |                |
|-----------------|-------------------|----------------|
|                 | DH66              | DH57           |
|                 | DH68              | DH60           |
|                 | DH69              | DH79           |
|                 | DH78              | DH83           |
|                 | DH88              | DH106          |
|                 | DH91              | DH111          |
|                 | DH119             | DH121          |
|                 | DH123             | DH140          |
|                 | DH132             | DH147          |
|                 | DH149             | DH150          |
| <hr/>           |                   |                |
| <i>Hap-4A-2</i> | Baicaomai         | Chang 6154     |
|                 | Baolin 9          | Chang 6452     |
|                 | Changzhi 620      | Jingnong79-15  |
|                 | Dali 1            | Jinmai 53      |
|                 | Dali 52           | Luohan 6       |
|                 | Fuzhuang 30       | Nongda 20074   |
|                 | Mazhamai          | Shannongfu 63  |
|                 | Mingxian 169      | Yumai 48       |
|                 | Shite 14          | Yunhan 22-33   |
|                 | Silenghonghulutou | Zhongda 91-9   |
|                 | Xiaobaimai        | Zhongmai 9     |
|                 | Xifeng 16         | Zhongzuo 60115 |
| <hr/>           |                   |                |
